# Supplementary material for: Genome Analyses Revealed Genetic Admixture and Selection Signatures in Bos indicus
Source: Research Square preprint supplement (doi:10.21203/rs.3.rs-484105/v1), 2021-05-06
Supplement: Supplementary file 1 [file 64b09476d10ef03b344ddb19.docx]

Table. X. The significance (p<0.05) of k proportion test for QTL number influencing different traits between the breed pairs

|  |
| --- |

|  | SW/TP | SW/GR | SW/VC | SW/HR | SW/KG | SW/OG | TP/GR | TP/VC | TP/HR | TP/KG | TP/OG |
| --- | --- | --- | --- | --- | --- | --- | --- | --- | --- | --- | --- |
| MILK YIELD - MILK COMPOSITION | * | * | * | * |  |  | * | * |  | * |  |
| MILK YIELD - REPRODUCTION |  |  | * |  |  |  |  | * |  |  |  |
| MILK YIELD - MEAT & CARCASS |  | * |  | * | * |  | * | * |  |  |  |
| MILK YIELD - HEALTH |  |  |  |  |  |  | * |  |  |  |  |
| MILK YIELD - PRODUCTION |  | * | * | * | * | * |  | * |  | * |  |
| MILK YIELD - EXTERIOR MORPHOLOGY |  |  |  |  |  |  |  |  |  |  |  |
| MILK COMPOSITION - REPRODUCTION |  | * |  | * |  |  | * |  |  | * |  |
| MILK COMPOSITION - MEAT & CARCASS |  |  |  |  |  |  |  |  |  |  |  |
| MILK COMPOSITION - HEALTH |  | * |  | * |  |  |  |  |  | * |  |
| MILK COMPOSITION - PRODUCTION |  | * |  | * |  |  | * |  |  |  |  |
| MILK COMPOSITION - EXTERIOR MORPHOLOGY |  | * |  | * |  |  | * | * |  |  |  |
| REPRODUCTION - MEAT & CARCASS |  | * |  | * | * |  | * |  |  |  |  |
| REPRODUCTION - HEALTH |  |  |  |  |  |  |  |  |  |  |  |
| REPRODUCTION - PRODUCTION |  |  |  |  | * |  |  |  |  | * |  |
| REPRODUCTION - EXTERIOR MORPHOLOGY |  |  |  |  |  |  |  | * |  |  |  |
| MEAT & CARCASS - HEALTH |  | * |  | * |  |  |  |  |  |  | * |
| MEAT & CARCASS - PRODUCTION |  |  |  |  |  |  | * |  |  |  |  |
| MEAT & CARCASS - EXTERIOR MORPHOLOGY |  | * |  | * |  |  | * |  |  |  |  |
| HEALTH - PRODUCTION |  | * |  | * |  |  | * |  |  | * | * |
| HEALTH - EXTERIOR MORPHOLOGY |  |  |  |  |  |  | * |  |  |  |  |
| PRODUCTION - EXTERIOR MORPHOLOGY |  |  | * |  |  | * |  | * |  |  |  |
|  |  |  |  |  |  |  |  |  |  |  |  |

|  | GR/VC | GR/HR | GR/KG | GR/OG | VC/HR | VC/KG | VC/OG | HR/KG | HR/OG | KG/OG |
| --- | --- | --- | --- | --- | --- | --- | --- | --- | --- | --- |
| MILK YIELD - MILK COMPOSITION |  |  |  | * |  |  | * | * | * |  |
| MILK YIELD - REPRODUCTION | * |  |  |  |  | * | * |  |  |  |
| MILK YIELD - MEAT & CARCASS | * |  |  | * |  |  |  | * | * |  |
| MILK YIELD - HEALTH |  |  |  |  |  |  |  |  |  |  |
| MILK YIELD - PRODUCTION | * |  | * |  |  |  | * | * |  |  |
| MILK YIELD - EXTERIOR MORPHOLOGY |  |  |  |  |  |  |  |  |  |  |
| MILK COMPOSITION - REPRODUCTION |  |  |  | * |  |  |  | * |  | * |
| MILK COMPOSITION - MEAT & CARCASS |  |  |  |  | * |  |  |  |  | * |
| MILK COMPOSITION - HEALTH |  |  |  | * |  |  |  |  | * | * |
| MILK COMPOSITION - PRODUCTION |  |  |  |  |  |  |  |  |  |  |
| MILK COMPOSITION - EXTERIOR MORPHOLOGY |  |  |  | * |  |  |  |  |  |  |
| REPRODUCTION - MEAT & CARCASS |  |  |  | * |  |  |  | * |  |  |
| REPRODUCTION - HEALTH |  |  |  |  |  | * |  |  |  |  |
| REPRODUCTION - PRODUCTION |  |  | * | * |  |  |  | * |  | * |
| REPRODUCTION - EXTERIOR MORPHOLOGY |  |  |  |  | * |  |  |  |  | * |
| MEAT & CARCASS - HEALTH |  |  |  | * | * |  |  |  | * | * |
| MEAT & CARCASS - PRODUCTION |  |  |  |  | * |  | * |  |  | * |
| MEAT & CARCASS - EXTERIOR MORPHOLOGY |  |  |  | * | * |  |  |  |  | * |
| HEALTH - PRODUCTION |  |  | * |  |  |  | * |  |  |  |
| HEALTH - EXTERIOR MORPHOLOGY |  |  |  |  |  |  |  |  |  |  |
| PRODUCTION - EXTERIOR MORPHOLOGY | * |  | * | * | * |  | * |  |  |  |
|  |  |  |  |  |  |  |  |  |  |  |
