# Supplementary material for: Genome Analyses Revealed Genetic Admixture and Selection Signatures in Bos indicus
Source: Research Square preprint supplement (doi:10.21203/rs.3.rs-484105/v1), 2021-05-06
Supplement: Supplementary file 3 [file 8e57fe2b94dd37038754f028.xlsx]

## Sheet: Sheet1
SW/TP					MILK YIELD	MILK COMPOSITION	REPRODUCTION	MEAT & CARC	HEALTH	PRODUCTION	EXTERIOR MORPHO.
	BovineHD0400009897		0.6699		1	2	1	3	1	2	2
	BovineHD0900025924		0.5567				3
	BovineHD2300011462		0.5153		1	7	4	5	4	1	1
	BovineHD0500015340		0.513		4	11	3	11	3	13	5
	BovineHD0500015347		0.5101		4	11	3	11	3	13	5
					10	31	14	30	11	29	13	138
SW/GR
	ARS-BFGL-NGS-73455		0.5722			2	4	2	1
	BovineHD0500015340		0.5676		4	11	3	11	3	13	5
	BovineHD0600006542		0.566		4	51	4	22	4	16
	BovineHD1800013738		0.566		1	2	2	3	2	2	2
	BovineHD2900002084		0.5626		1	1	5	6	1	4	8
					10	67	18	44	11	35	15	200
SW/VC
	BovineHD2900011510		0.6928		1	2	2	8	1	3	4
	BovineHD1900018844		0.6122			11	9	2	8	12	2
	BovineHD0800005082		0.6048		1			3	1	3
	BovineHD0900030139		0.6008
	BovineHD1900008163		0.5679		1	11	9	2	8	12	2
					3	24	20	15	18	30	8	118
SW/HR
	BovineHD0300002536		0.5302			2				1
	BovineHD0600006551		0.5102		4	51	4	22	4	15
	BovineHD1600000291		0.4739							4	3
	BovineHD0700023034		0.4642					3	1
	BovineHD2900005720		0.4554		1	1	5	5		6	6
					5	54	9	30	5	26	9	138
SW/KG
	BovineHD2400003366		0.8026				1	3		1	2
	BovineHD0200022436		0.7257				3	2	3	1
	BovineHD0500014902		0.7009		5	13	1	18	4	12	5
	BovineHD0500016295		0.6791		5	12	2	11	4	19	7
	BovineHD2400005678		0.6766			1	2	2	4	2	2
					10	26	9	36	15	35	16	147
SW/OG
	BovineHD0800001684		0.6405				1	5		1
	BovineHD0100045717		0.633							2
	BovineHD1100008163		0.5633		1	8	5	4	1	16	2
	BovineHD2300005131		0.5626		4	5	5	2	10	6	1
	BovineHD1700010258		0.5567		2	5	3	3	3	3	1
					7	18	14	14	14	28	4	99
TP/GR
	BovineHD0300009588		0.5945		2	8	1	44		7
	BovineHD0600022359		0.5882			31		2
	BovineHD1300006213		0.585			3	3	6	8	2	3
	BovineHD0400014498		0.5552		1	1	9	2	32	2
	BovineHD1300015061		0.5551		1	9	2	4	5	3	7
					4	52	15	58	45	14	10	198
TP/VC
	BovineHD1900008163		0.7376			11	9	2	8	12	2
	BovineHD0500015347		0.6612		4	11	3	11	3	13	5
	BovineHD0200040582		0.6594			2	12	4	1	2
	BovineHD0400019963		0.6506				13			2
	BovineHD1100014365		0.575			8	2	6	2	3	2
					4	32	39	23	14	32	9	153
TP/HR
	Hapmap50029-BTA-55899		0.536
	BovineHD2800011107		0.502					1
	BovineHD2300010155		0.4858		1		2	1	10	2	2
	BovineHD0600034051		0.4852
	BovineHD1000012612		0.4852		1	4	2	2	3	2	3
					2	4	4	4	13	4	5	36
TP/KG
	BovineHD1300018382		0.8133			8	2				1
	BovineHD1300017888		0.7111			8	1			1	1
	BovineHD0300009005		0.7037		3	8		9		13
	BovineHD1300013279		0.6936		1	4	1	4	4	3	6
	BovineHD1600011321		0.677				1	5	1	5	2
					4	28	5	18	5	22	10	92
TP/OG
	BovineHD0200032623		0.6276
	BovineHD0500015347		0.5846		4	11	3	11	3	13	5
	BovineHD0200025655		0.5781					1
	BovineHD1600011321		0.5781				1	5	1	5	2
	BovineHD1000003702		0.5752		2	7	2	5		3	3
					6	18	6	22	4	21	10	87
GR/VC
	BovineHD1900018844		0.8131			11	9	2	8	12	2
	BovineHD2900011510		0.7681		1	2	2	8	1	3	4
	BovineHD1200026864		0.7075			1	6	2	1	15	2
	BovineHD1800003071		0.6588
	BovineHD0700016160		0.6375		2	1	2	7	3	3	2
					3	15	19	19	13	33	10	112
GR/HR
	BovineHD1000011926		0.5931
	BovineHD0200011619		0.5849			2	6	5	1	2
	BTA-29154-no-rs		0.5836
	BovineHD0500004459		0.5538		2	7	2	5	4	3	4
	BovineHD1700009308		0.549		1	3	1	1	1	2	1
					3	12	9	11	6	7	5	53
GR/KG
	BovineHD0500019637		0.8131		2	6	1	4	2	11	3
	BovineHD0200011901		0.8052			2	4	4	1	2
	BovineHD0500019918		0.7587		1		2	3		6	3
	BovineHD0500022897		0.7545			2
	BovineHD0500019019		0.7517		3	7	1	5	2	11	3
					6	17	8	16	5	30	9	91
GR/OG
	BovineHD0500012675		0.6509		3	12	4	15	7	16	5
	BovineHD0600004423		0.6509		7	21	5	21	3	13	2
	BovineHD1700012812		0.6503			1		2
	BovineHD2100019295		0.648			1
	BovineHD2600014395		0.6294						1
					10	35	9	38	11	29	7	139
VC/HR
	BovineHD1900008163		0.7951			11	9	2	8	12	2
	BovineHD0800009103		0.6771				3	44	5	2	1
	BovineHD1900018844		0.668			11	9	2	8	12	2
	BovineHD1000017605		0.6672			4	9	3	2	2	3
	BovineHD1600005137		0.5981					5	1	1	1
						26	30	56	24	29	9	174
VC/KG
	BovineHD0200022436		0.7624				3	2	3	1
	BovineHD2800011352		0.7052			2		1
	BovineHD4100013548		0.7016		1	3	3	5	2	4	4
	BovineHD0400019963		0.6945				13			2
	BovineHD1300016831		0.6774		1	9	3	2		3	7
					2	14	22	10	5	10	11	74
VC/OG
	BovineHD1200026864		0.6518			1	6	2	1	15	2
	BovineHD1100010804		0.6178		1	9	1	4	2	4	4
	BovineHD1900008163		0.6122			11	9	2	8	12	2
	BovineHD1500023985		0.6112				1	2		1
	BovineHD0400020619		0.6079				1
					1	21	18	10	11	32	8	101
HR/KG
	BovineHD1300013278		0.7951		1	4	1	4	4	3	6
	BovineHD0500012581		0.7725		3	12	2	16	8	16	7
	BovineHD0500012600		0.7474		3	12	2	15	7	16	7
	BovineHD1300018335		0.6778			8	1				1
	BovineHD2500012106		0.6778
					7	36	6	35	19	35	21	159
HR/OG
	BovineHD1700005865		0.5923			4	2	2		3	1
	BovineHD0400025542		0.5545		1	2	1	9
	BovineHD1500000761		0.5471			2	2	3		4
	BovineHD1100012405		0.5441		1	9		5	1	4	4
	BovineHD0800031795		0.5421				1	1
					2	17	6	20	1	11	5	62
KG/OG
	BovineHD2100009715		0.7801				1	1	3	1
	BovineHD1300009262		0.7236				17	29	5	3	3
	BovineHD2100009534		0.7231				1	2	3	1
	BovineHD1800005173		0.7147			3	3	4	3
	BovineHD1300009109		0.6666				17	28	5	3	3
						3	39	64	19	8	6	139

## Sheet: Sheet2
	MILK YIELD	MILK COMPOSITION	REPRODUCTION	MEAT & CARC	HEALTH	PRODUCTION	EXTERIOR MORPHO.	TOTAL
SW/TP	10	31	14	30	11	29	13	138
SW/GR	10	67	18	44	11	35	15	200
SW/VC	3	24	20	15	18	30	8	118
SW/HR	5	54	9	30	5	26	9	138
SW/KG	10	26	9	36	15	35	16	147
SW/OG	7	18	14	14	14	28	4	99
TP/GR	4	52	15	58	45	14	10	198
TP/VC	4	32	39	23	14	32	9	153
TP/HR	2	4	4	4	13	4	5	36
TP/KG	4	28	5	18	5	22	10	92
TP/OG	6	18	6	22	4	21	10	87
GR/VC	3	15	19	19	13	33	10	112
GR/HR	3	12	9	11	6	7	5	53
GR/KG	6	17	8	16	5	30	9	91
GR/OG	10	35	9	38	11	29	7	139
VC/HR		26	30	56	24	29	9	174
VC/KG	2	14	22	10	5	10	11	74
VC/OG	1	21	18	10	11	32	8	101
HR/KG	7	36	6	35	19	35	21	159
HR/OG	2	17	6	20	1	11	5	62
KG/OG		3	39	64	19	8	6	139

## Sheet: k proportions test
	XLSTAT 2018.2.50198 - k proportions test - Start time: 21-Mar-18 at 4:15:06 PM / End time: 21-Mar-18 at 4:15:07 PM / Microsoft Excel 12.06762
	Frequencies: Workbook = 21 PAIR QTL ANNOTATION.xlsx / Sheet = Sheet3 / Range = Sheet3!$B$1:$B$6 / 5 rows and 1 column
	Sample sizes: Workbook = 21 PAIR QTL ANNOTATION.xlsx / Sheet = Sheet3 / Range = Sheet3!$D$1:$D$6 / 5 rows and 1 column
	Sample labels: Workbook = 21 PAIR QTL ANNOTATION.xlsx / Sheet = Sheet3 / Range = Sheet3!$A$1:$A$6 / 5 rows and 1 column
	Significance level (%): 5
	Seed (random numbers): 862010112
	Chi-square test:
	Chi-square (Observed value)	23.7902
	Chi-square (Critical value)	9.48773
	DF	4
	p-value	< 0.0001
	alpha	0.05
	Test interpretation:
	H0: The proportions are equal.
	Ha: At least one proportion is different from another.
	As the computed p-value is lower than the significance level alpha=0.05, one should reject the null hypothesis H0, and accept the alternative hypothesis Ha.
	The risk to reject the null hypothesis H0 while it is true is lower than 0.01%.
	Monte Carlo method (Number of simulations = 5000):
	Chi-square (Observed value)	23.7902
	Chi-square (Critical value)	9.28911
	DF	4
	p-value	< 0.0001
	alpha	0.05
	Test interpretation:
	H0: The proportions are equal.
	Ha: At least one proportion is different from another.
	As the computed p-value is lower than the significance level alpha=0.05, one should reject the null hypothesis H0, and accept the alternative hypothesis Ha.
	The risk to reject the null hypothesis H0 while it is true is lower than 0.01%.
	Marascuilo procedure:
	Contrast	Value	Critical value	Significant
	|p(S1) - p(s2)|	0.0724638	0.114634	No
	|p(S1) - p(s3)|	0.057971	0.11144	No
	|p(S1) - p(s4)|	0.130435	0.12546	Yes
	|p(S1) - p(s5)|	0.202899	0.135424	Yes
	|p(s2) - p(s3)|	0.0144928	0.127741	No
	|p(s2) - p(s4)|	0.057971	0.14014	No
	|p(s2) - p(s5)|	0.130435	0.149126	No
	|p(s3) - p(s4)|	0.0724638	0.13754	No
	|p(s3) - p(s5)|	0.144928	0.146685	No
	|p(s4) - p(s5)|	0.0724638	0.1576	No
	Sample	Proportion	Groups
	S1	0.0724638	A
	s3	0.130435	A	B
	s2	0.144928	A	B
	s4	0.202899		B
	s5	0.275362		B

## Sheet: SW-TP
Name		success	failure	total
MILK YIELD		10	128	138
MILK COMPOSITION		31	107	138
REPRODUCTION		14	124	138
MEAT & CARC		30	108	138
HEALTH		11	127	138
PRODUCTION		29	109	138
EXTERIOR MORPHO.		13	125	138

## Sheet: k proportions test1-SW-TP
	XLSTAT 2018.2.50198 - k proportions test - Start time: 21-Mar-18 at 4:32:19 PM / End time: 21-Mar-18 at 4:32:19 PM / Microsoft Excel 12.06762
	Frequencies: Workbook = 21 PAIR QTL ANNOTATION.xlsx / Sheet = Sheet5 / Range = Sheet5!$C$1:$C$8 / 7 rows and 1 column
	Sample sizes: Workbook = 21 PAIR QTL ANNOTATION.xlsx / Sheet = Sheet5 / Range = Sheet5!$E$1:$E$8 / 7 rows and 1 column
	Sample labels: Workbook = 21 PAIR QTL ANNOTATION.xlsx / Sheet = Sheet5 / Range = Sheet5!$A$1:$A$8 / 7 rows and 1 column
	Significance level (%): 5
	Seed (random numbers): 1493820192
	Chi-square test:
	Chi-square (Observed value)	33.5797
	Chi-square (Critical value)	12.5916
	DF	6
	p-value	< 0.0001
	alpha	0.05
	Test interpretation:
	H0: The proportions are equal.
	Ha: At least one proportion is different from another.
	As the computed p-value is lower than the significance level alpha=0.05, one should reject the null hypothesis H0, and accept the alternative hypothesis Ha.
	The risk to reject the null hypothesis H0 while it is true is lower than 0.01%.
	Monte Carlo method (Number of simulations = 5000):
	Chi-square (Observed value)	33.5797
	Chi-square (Critical value)	12.5248
	DF	6
	p-value	< 0.0001
	alpha	0.05
	Test interpretation:
	H0: The proportions are equal.
	Ha: At least one proportion is different from another.
	As the computed p-value is lower than the significance level alpha=0.05, one should reject the null hypothesis H0, and accept the alternative hypothesis Ha.
	The risk to reject the null hypothesis H0 while it is true is lower than 0.01%.
	Marascuilo procedure:
	Contrast	Value	Critical value	Significant
	|p(MILK YIELD) - p(MILK COMPOSITION)|	0.152174	0.148409	Yes
	|p(MILK YIELD) - p(REPRODUCTION)|	0.0289855	0.120209	No
	|p(MILK YIELD) - p(MEAT & CARC)|	0.144928	0.14716	No
	|p(MILK YIELD) - p(HEALTH)|	0.00724638	0.113252	No
	|p(MILK YIELD) - p(PRODUCTION)|	0.137681	0.145869	No
	|p(MILK YIELD) - p(EXTERIOR MORPHO.)|	0.0217391	0.117976	No
	|p(MILK COMPOSITION) - p(REPRODUCTION)|	0.123188	0.155595	No
	|p(MILK COMPOSITION) - p(MEAT & CARC)|	0.00724638	0.177245	No
	|p(MILK COMPOSITION) - p(HEALTH)|	0.144928	0.150285	No
	|p(MILK COMPOSITION) - p(PRODUCTION)|	0.0144928	0.176174	No
	|p(MILK COMPOSITION) - p(EXTERIOR MORPHO.)|	0.130435	0.153877	No
	|p(REPRODUCTION) - p(MEAT & CARC)|	0.115942	0.154405	No
	|p(REPRODUCTION) - p(HEALTH)|	0.0217391	0.122519	No
	|p(REPRODUCTION) - p(PRODUCTION)|	0.108696	0.153175	No
	|p(REPRODUCTION) - p(EXTERIOR MORPHO.)|	0.00724638	0.126898	No
	|p(MEAT & CARC) - p(HEALTH)|	0.137681	0.149053	No
	|p(MEAT & CARC) - p(PRODUCTION)|	0.00724638	0.175124	No
	|p(MEAT & CARC) - p(EXTERIOR MORPHO.)|	0.123188	0.152673	No
	|p(HEALTH) - p(PRODUCTION)|	0.130435	0.147778	No
	|p(HEALTH) - p(EXTERIOR MORPHO.)|	0.0144928	0.120329	No
	|p(PRODUCTION) - p(EXTERIOR MORPHO.)|	0.115942	0.151429	No
	Sample	Proportion	Groups
	MILK YIELD	0.0724638	A
	HEALTH	0.0797101	A	B
	EXTERIOR MORPHO.	0.0942029	A	B
	REPRODUCTION	0.101449	A	B
	PRODUCTION	0.210145	A	B
	MEAT & CARC	0.217391	A	B
	MILK COMPOSITION	0.224638		B

## Sheet: SW-GR
Name		success	failure	total
MILK YIELD		10	190	200
MILK COMPOSITION		67	133	200
REPRODUCTION		18	182	200
MEAT & CARC		44	156	200
HEALTH		11	189	200
PRODUCTION		35	165	200
EXTERIOR MORPHO.		15	185	200

## Sheet: k proportions test1-SW-GR
	XLSTAT 2018.2.50198 - k proportions test - Start time: 21-Mar-18 at 4:47:31 PM / End time: 21-Mar-18 at 4:47:31 PM / Microsoft Excel 12.06762
	Frequencies: Workbook = 21 PAIR QTL ANNOTATION.xlsx / Sheet = Sheet7 / Range = Sheet7!$C$1:$C$8 / 7 rows and 1 column
	Sample sizes: Workbook = 21 PAIR QTL ANNOTATION.xlsx / Sheet = Sheet7 / Range = Sheet7!$E$1:$E$8 / 7 rows and 1 column
	Sample labels: Workbook = 21 PAIR QTL ANNOTATION.xlsx / Sheet = Sheet7 / Range = Sheet7!$A$1:$A$8 / 7 rows and 1 column
	Significance level (%): 5
	Seed (random numbers): 2048547711
	Chi-square test:
	Chi-square (Observed value)	110.483
	Chi-square (Critical value)	12.5916
	DF	6
	p-value	< 0.0001
	alpha	0.05
	Test interpretation:
	H0: The proportions are equal.
	Ha: At least one proportion is different from another.
	As the computed p-value is lower than the significance level alpha=0.05, one should reject the null hypothesis H0, and accept the alternative hypothesis Ha.
	The risk to reject the null hypothesis H0 while it is true is lower than 0.01%.
	Monte Carlo method (Number of simulations = 5000):
	Chi-square (Observed value)	110.483
	Chi-square (Critical value)	12.7325
	DF	6
	p-value	< 0.0001
	alpha	0.05
	Test interpretation:
	H0: The proportions are equal.
	Ha: At least one proportion is different from another.
	As the computed p-value is lower than the significance level alpha=0.05, one should reject the null hypothesis H0, and accept the alternative hypothesis Ha.
	The risk to reject the null hypothesis H0 while it is true is lower than 0.01%.
	Marascuilo procedure:
	Contrast	Value	Critical value	Significant
	|p(MILK YIELD) - p(MILK COMPOSITION)|	0.285	0.130445	Yes
	|p(MILK YIELD) - p(REPRODUCTION)|	0.04	0.0902594	No
	|p(MILK YIELD) - p(MEAT & CARC)|	0.17	0.117448	Yes
	|p(MILK YIELD) - p(HEALTH)|	0.005	0.0791375	No
	|p(MILK YIELD) - p(PRODUCTION)|	0.125	0.109909	Yes
	|p(MILK YIELD) - p(EXTERIOR MORPHO.)|	0.025	0.08578	No
	|p(MILK COMPOSITION) - p(REPRODUCTION)|	0.245	0.138498	Yes
	|p(MILK COMPOSITION) - p(MEAT & CARC)|	0.115	0.157572	No
	|p(MILK COMPOSITION) - p(HEALTH)|	0.28	0.131521	Yes
	|p(MILK COMPOSITION) - p(PRODUCTION)|	0.16	0.152036	Yes
	|p(MILK COMPOSITION) - p(EXTERIOR MORPHO.)|	0.26	0.135621	Yes
	|p(REPRODUCTION) - p(MEAT & CARC)|	0.13	0.126332	Yes
	|p(REPRODUCTION) - p(HEALTH)|	0.035	0.0918068	No
	|p(REPRODUCTION) - p(PRODUCTION)|	0.085	0.119356	No
	|p(REPRODUCTION) - p(EXTERIOR MORPHO.)|	0.015	0.0975908	No
	|p(MEAT & CARC) - p(HEALTH)|	0.165	0.118642	Yes
	|p(MEAT & CARC) - p(PRODUCTION)|	0.045	0.141043	No
	|p(MEAT & CARC) - p(EXTERIOR MORPHO.)|	0.145	0.123172	Yes
	|p(HEALTH) - p(PRODUCTION)|	0.12	0.111184	Yes
	|p(HEALTH) - p(EXTERIOR MORPHO.)|	0.02	0.0874068	No
	|p(PRODUCTION) - p(EXTERIOR MORPHO.)|	0.1	0.116005	No
	Sample	Proportion	Groups
	MILK YIELD	0.05	A
	HEALTH	0.055	A
	EXTERIOR MORPHO.	0.075	A	B
	REPRODUCTION	0.09	A	B
	PRODUCTION	0.175		B	C
	MEAT & CARC	0.22			C	D
	MILK COMPOSITION	0.335				D

## Sheet: SW-VC
Name		success	failure	total
MILK YIELD		3	115	118
MILK COMPOSITION		24	94	118
REPRODUCTION		20	98	118
MEAT & CARC		15	103	118
HEALTH		18	100	118
PRODUCTION		30	88	118
EXTERIOR MORPHO.		8	110	118

## Sheet: k proportions test1-SW-VC
	XLSTAT 2018.2.50198 - k proportions test - Start time: 21-Mar-18 at 4:51:02 PM / End time: 21-Mar-18 at 4:51:02 PM / Microsoft Excel 12.06762
	Frequencies: Workbook = 21 PAIR QTL ANNOTATION.xlsx / Sheet = SW-VC / Range = 'SW-VC'!$C$1:$C$8 / 7 rows and 1 column
	Sample sizes: Workbook = 21 PAIR QTL ANNOTATION.xlsx / Sheet = SW-VC / Range = 'SW-VC'!$E$1:$E$8 / 7 rows and 1 column
	Sample labels: Workbook = 21 PAIR QTL ANNOTATION.xlsx / Sheet = SW-VC / Range = 'SW-VC'!$A$1:$A$8 / 7 rows and 1 column
	Significance level (%): 5
	Seed (random numbers): 72066218
	Chi-square test:
	Chi-square (Observed value)	35.2175
	Chi-square (Critical value)	12.5916
	DF	6
	p-value	< 0.0001
	alpha	0.05
	Test interpretation:
	H0: The proportions are equal.
	Ha: At least one proportion is different from another.
	As the computed p-value is lower than the significance level alpha=0.05, one should reject the null hypothesis H0, and accept the alternative hypothesis Ha.
	The risk to reject the null hypothesis H0 while it is true is lower than 0.01%.
	Monte Carlo method (Number of simulations = 5000):
	Chi-square (Observed value)	35.2175
	Chi-square (Critical value)	12.5169
	DF	6
	p-value	< 0.0001
	alpha	0.05
	Test interpretation:
	H0: The proportions are equal.
	Ha: At least one proportion is different from another.
	As the computed p-value is lower than the significance level alpha=0.05, one should reject the null hypothesis H0, and accept the alternative hypothesis Ha.
	The risk to reject the null hypothesis H0 while it is true is lower than 0.01%.
	Marascuilo procedure:
	Contrast	Value	Critical value	Significant
	|p(MILK YIELD) - p(MILK COMPOSITION)|	0.177966	0.141185	Yes
	|p(MILK YIELD) - p(REPRODUCTION)|	0.144068	0.132908	Yes
	|p(MILK YIELD) - p(MEAT & CARC)|	0.101695	0.120351	No
	|p(MILK YIELD) - p(HEALTH)|	0.127119	0.128213	No
	|p(MILK YIELD) - p(PRODUCTION)|	0.228814	0.151248	Yes
	|p(MILK YIELD) - p(EXTERIOR MORPHO.)|	0.0423729	0.0968914	No
	|p(MILK COMPOSITION) - p(REPRODUCTION)|	0.0338983	0.179749	No
	|p(MILK COMPOSITION) - p(MEAT & CARC)|	0.0762712	0.170674	No
	|p(MILK COMPOSITION) - p(HEALTH)|	0.0508475	0.176306	No
	|p(MILK COMPOSITION) - p(PRODUCTION)|	0.0508475	0.193704	No
	|p(MILK COMPOSITION) - p(EXTERIOR MORPHO.)|	0.135593	0.155026	No
	|p(REPRODUCTION) - p(MEAT & CARC)|	0.0423729	0.163893	No
	|p(REPRODUCTION) - p(HEALTH)|	0.0169492	0.169751	No
	|p(REPRODUCTION) - p(PRODUCTION)|	0.0847458	0.187757	No
	|p(REPRODUCTION) - p(EXTERIOR MORPHO.)|	0.101695	0.147529	No
	|p(MEAT & CARC) - p(HEALTH)|	0.0254237	0.160109	No
	|p(MEAT & CARC) - p(PRODUCTION)|	0.127119	0.179087	No
	|p(MEAT & CARC) - p(EXTERIOR MORPHO.)|	0.059322	0.136324	No
	|p(HEALTH) - p(PRODUCTION)|	0.101695	0.184463	No
	|p(HEALTH) - p(EXTERIOR MORPHO.)|	0.0847458	0.143313	No
	|p(PRODUCTION) - p(EXTERIOR MORPHO.)|	0.186441	0.164244	Yes
	Sample	Proportion	Groups
	MILK YIELD	0.0254237	A
	EXTERIOR MORPHO.	0.0677966	A	B
	MEAT & CARC	0.127119	A	B	C
	HEALTH	0.152542	A	B	C
	REPRODUCTION	0.169492		B	C
	MILK COMPOSITION	0.20339		B	C
	PRODUCTION	0.254237			C

## Sheet: SW-HR
Name		success	failure	total
MILK YIELD		5	133	138
MILK COMPOSITION		54	84	138
REPRODUCTION		9	129	138
MEAT & CARC		30	108	138
HEALTH		5	133	138
PRODUCTION		26	112	138
EXTERIOR MORPHO.		9	129	138

[truncated: 35 more sheets: k proportions test1-SW-HR, SW-KG, k proportions test1-SW-KG, SW-OG, k proportions test2-SW-OG, TP-GR, k proportions test1-TP-GR, TP-VC, k proportions test1-TP-VC, TP-HR, k proportions test1-TP-HR, TP-KG, k proportions test1-TP-KG, TP-OG, k proportions test1-TP-OG, GR-VC, k proportions test1-GR-VC, GR-HR, k proportions test1-GR-HR, GR-KG …]
